# Supplementary material
Source: PubMed Central journal article supplement (PMC3344996)
Supplement: 1201626109_pnas.1201626109_SI.pdf [file 1201626109_pnas.1201626109_SI.pdf]

# Supporting Information

Rivron et al. 10.1073/pnas.1201626109

## SI Methods

**Cell Culture and Reagents. Human mesenchymal stem cells.** Human Bone marrow aspirates are obtained from donors after written informed consent, and human Mesenchymal Stem Cells (hMSCs) are isolated as follows. Aspirates are resuspended by using 20-gauge needles, plated at a density of  $5 \times 10^5$  cells per square centimeter and are cultured in hMSC proliferation medium containing  $\alpha$ -MEM (Life Technologies), 10% FBS (Cambrex), 0.2 mM ascorbic acid (Asap; Life Technologies), 2 mM l-glutamine (Life Technologies), 100 units/mL penicillin (Life Technologies), 10  $\mu$ g/mL streptomycin (Life Technologies), and 1 ng/mL basic FGF (Instruchemie). Cells are grown at 37°C in a humid atmosphere with 5% CO<sub>2</sub>. Medium is refreshed twice a week, and cells are used for further subculturing or cryopreservation. For experiments, the hMSC medium (termed Exp. Medium) is serum-free and composed of Dulbecco's Modified Eagle's Medium supplemented with  $10^{-7}$  M dexamethasone, 50 mg/mL ascorbate 2-phosphate, 40 mg/mL proline, 100 mg/mL pyruvate, and 50 mg/mL ITS1+Premix (Becton-Dickinson, MA: 6.25 mg/mL insulin, 6.25 mg/mL transferrin, 6.25 ng/mL selenious acid, 1.25 mg/mL bovine serum albumin, 5.35 mg/mL linoleic acid).

**Human umbilical vein endothelial cells.** Human umbilical vein endothelial cells (HUVECs) are purchased from Lonza (Lonza, group Ltd. Switzerland). Cells are grown at 37°C in a humid atmosphere with 5% carbon dioxide (CO<sub>2</sub>) in endothelial growth medium-2 (Cambrex). Cells are routinely split at a 1:5 ratio and cultured in fewer than five passages. Only HUVECs from passage 3 or 4 are used to seed the coculture experiments.

**MicroWell Array (MWA) and Shaped Well Array (SWA) Agarose chips.** Micropatterned agarose chips for nonadherent cell culture are formed by replica molding. MWA: silicon wafers are etched to form cylindrical wells of 200  $\mu$ m diameter and 160  $\mu$ m deep. The interspace between wells is 100  $\mu$ m. Each chip contains 2,865 wells and a total diameter of 11.5 mm. SWA: SU-8 photoresist is patterned on top of a silicon wafer by depositing three layers to obtain a total height of 700  $\mu$ m. Wells are geometric (circle, square, triangle) and have a constant surface area of 1 mm<sup>2</sup>. One SWA includes 15 geometric wells and has a total diameter of 11.5 mm. Structures from MWA and SWA are replicated in poly(dimethylsiloxane) (PDMS; Sylgard 184, Dow Corning) with a total thickness of 8 mm, individual chips are punched, cleaned, and sterilized in ethanol. Routinely, in the laminar flow cabinet, the PDMS stamps are deposited in the center of the well of a 6-well plate (microstructures on top) and a boiling solution of 3% agarose (Ultra pure agarose, Invitrogen) is poured on the PDMS stamp (8 mL), quickly centrifugated (1,300  $\times$  g for 1 min) to remove air bubbles and let to solidify. Upon solidification, agarose chips are demolded using a spatula and sterile gloves, punched to 11.5 mm diameter and placed in a 12 well plate. After wetting using corresponding Exp. medium (500 microliters), a concentrated suspension of cells (0.4 millions) is seeded, allowed to settle for 15 min on the chip and 1.5 milliliters of Exp. medium is then added. Cell clusters (approximately 500 cells/cell cluster) spontaneously fuse within 24 h are cultured for 150 h. Half of the medium is changed every day of culture. After 150 h, cell clusters are flushed out using Exp. medium, centrifuged (340  $\times$  g, 1 min), resuspended in the Exp. medium and seeded on the SWAs. 20,000 cell clusters are seeded per SWA. Clusters are allowed to settle in the wells for 1 min then centrifuged (340  $\times$  g, 1 min). Cell clusters which do not settle in the wells are harvested

using a pipet and seeded again. For optimal seeding, 2–3 rounds of seeding are done. 1.5 mL of Exp. medium is added. Half of the medium is changed every day of culture. Cell clusters fuse within 24 h. Resulting tissues contain approximately 200,000 cells, have a surface area of 1 mm<sup>2</sup>, and a thickness of 250  $\mu$ m.

**Coculture.** A coculture of 92% hMSC and 8% huvEC in Exp. Medium (as described above) are used for all experiments. Half the medium is replaced every day. Blebistatin (50 mM, Sigma-Aldrich) and Y-27632 (10 mM, Calbiochem) are added 24 h after seeding microscale clusters on the SWA. Half the medium is replaced every day with constant total concentrations of 50 mM of Blebistatin and 10  $\mu$ M of Y-27632 until day 5. VEGF scavenging is supplemented to the culture medium at 2  $\mu$ g/mL. The anti-rh-VEGF (R&D systems) antibody which binds both to VEGF165 and VEGF121. Pellet culture for the experiments of Fig. 4 G and H are done by pulling 0.5 million cells (92% hMSC and 8% huvEC) in a 10 mL tube, centrifuging to form a pellet (340  $\times$  g, 2 min). 5 mL of medium is added. Pellets rounded up and form a sphere within 48 h and are cultured for 6 d.

**Immunohistochemical Analysis.** Tissue are cultured for 5 d after seeding on the SWA with or without Y27632+Blebistatin. After harvesting, tissues are frozen in Cryomatrix at  $-60^\circ\text{C}$ . Sections (7  $\mu$ m) are cut with a cryotome. Sections are fixed in cold acetone for 5 min and air-dried. Sections are rehydrated for 10 min, after which they are incubated for 30 min with 10% FBS in PBS to block nonspecific background staining. Sections are incubated with monoclonal mouse antihuman PECAM-1 antibody (Dako), a monoclonal rabbit antihuman VEGF Carboxyterminal end antibody (Abcam), a monoclonal rabbit antihuman VEGFR2 antibody (Cell Signaling), a rabbit antihuman HIF1a antibody (Abcam), Phalloidin-Alexa fluor 488 conjugated antibody (Invitrogen), or a monoclonal mouse antihuman Phospho-Myosin Light Chain 2 (Ser19) (Cell signaling technology) for 1 to 4 h. Sections are washed in PBS and subsequently incubated with the secondary antibody (Alexa Fluor 488 or 594 antibody, Invitrogen). Samples are counterstained with Dapi (Sigma). Cellular proliferation is assessed by EdU (5-ethynyl-2'-deoxyuridine) incorporation over a period of 12 h ending at 24, 96, and 144 h of culture. The cell proliferation assay is performed using the Click-iT™ EdU kit (Invitrogen). Pictures are taken using a confocal microscope (Leica LSM500). To prevent biased measurements, quantifications of the area of PECAM-1<sup>+</sup> cells on Figs. 3 and 4 are done using a threshold applied on images based on size and circularity (Image J) to select for the PECAM-1<sup>+</sup> structures which elongated in the main plane of the tissue. Thresholded PECAM-1<sup>+</sup> structures are termed vascular structures (VS). Quantification on Fig. S5 is done without a threshold. For quantification of Figs. 3 and 4, each image is divided into 20 boxes from the center to the periphery. Each box is used for quantification of either the number of nuclei, the area of VS, the intensity of VEGF fluorescence, or the intensity of the VEGFR-2 fluorescence. Results are the average of five nonconsecutive cuts for each three different biological samples. Results are used to create the 20 boxes-graphics presented in Fig. 3B or pooled to create graphics (Fig. 3 A, D; Fig. 4 A–F). Color maps (Fig. 3) show values, in five consecutive regions ranging from the tissue center to the tissue corners, of VS density (scale from 1 to 4.8) and VS/nucleus density (scale from 1 to 2.5) normalized to the central region. The same scale is used for normal and impaired compaction. Contribution of tissue density to VS density is measured as
